# Supplementary material
Source: PubMed Central journal article supplement (PMC10898225)
Supplement: NIHMS1908760-supplement-Supp_1.pdf [file NIHMS1908760-supplement-Supp_1.pdf]

## **Disclosures, Michael Geruso**

No funder or other agency had the opportunity to review this research prior to publication. Potentially relevant professional and financial relationships in the past 3 years:

1. Harvard University: post-doc funded by Robert Wood Johnson Foundation (salary)
2. University of Texas at Austin: Assistant Professor (salary)
3. Harvard University: Consulting on US insurance market regulation and health plan design (consulting fees <\$10,000)
4. National Bureau of Economic Research (conference travel reimbursement)
5. UT Population Health Initiative Pilot Grant. PI (\$7,500)
6. Pfizer center grant: "Selection Incentives in US Health Plan Design." PI. (\$70,000)
7. NIH R03 Grant: "Impacts of Sanitation on Child and Maternal Health" 2014-2016 1R03HD081209-01. PI. (\$100,000.)
