# Supplementary material
Source: PubMed Central journal article supplement (PMC10898225)
Supplement: NIHMS1908760-supplement-Supp_2.pdf [file NIHMS1908760-supplement-Supp_2.pdf]

## **Disclosures, Timothy Layton**

No funder or other agency had the opportunity to review this research prior to publication. Potentially relevant professional and financial relationships in the past 3 years:

1. NIMH Postdoctoral Fellowship [T32-019733] (salary)
2. Harvard Medical School: Assistant Professor (salary)
3. Litigation consulting with Greylock MacKinnon and Associates (consulting fees \$30-40k)
4. Consulting fees from University of Texas – Austin for project “Selection Incentives in US Health Plan Design.” [funded by Pfizer] (\$10k)
5. Grant from John and Laura Arnold Foundation. “Risk Adjustment Re-design.” Co-investigator. (12% time)
6. Grant from NIMH. “Mental Health Coverage and Payment in Private Health Plans.” [R01-MH094290] Co-investigator. (20% time)
7. Grant from Anthem, Inc. “Adverse Selection and Risk Adjustment in the Colorado Health Insurance Marketplace” (15% time)
8. Grant from NIA. “Intended and Unintended Effects of Risk Adjustment Payments for Individuals with Chronic Conditions on Diagnosis and Treatment in Medicare Advantage.” (15% time)
