# Supplementary material
Source: PubMed Central journal article supplement (PMC10898225)
Supplement: NIHMS1908760-supplement-Supp_5.pdf [file NIHMS1908760-supplement-Supp_5.pdf]

To generate Figure 5 from “Selection in Health Insurance Markets and Its Policy Remedies” take the following steps.

1. Download these files:

GL\_CostRevByClass.dta

GL\_Final\_Figures.do

2. Update the directory paths in GL\_Final\_Figures.do to your machine

3. Run GL\_CostRevByClass.dta
